# Supplementary material
Source: publisher figshare collection journal article supplement (https://acs.figshare.com/ndownloader/files/7597261)
Supplement: Supplementary file 1 [file 7597261]

# Supporting Information

## Microwave-Assisted Synthesis of Azacoumarin Fluorophores and the Fluorescence Characterization

Hikaru Takano, Tetsuo Narumi,<sup>†</sup> Wataru Nomura, and Hirokazu Tamamura\*

Institute of Biomaterials and Bioengineering, Tokyo Medical and Dental University,  
2-3-10 Kandasurugadai, Chiyoda-ku, Tokyo 101-0062, Japan

\*E-mail: [tamamura.mr@tmd.ac.jp](mailto:tamamura.mr@tmd.ac.jp) (H. Tamamura)

Present address: <sup>†</sup>Faculty of Engineering, Shizuoka University, Hamamatsu 432-8561, Japan

### Table of contents

|      |                                                                                 |     |
|------|---------------------------------------------------------------------------------|-----|
| I.   | Determining fluorescent quantum yield.....                                      | S-2 |
| II.  | Calculating the saturated concentration of compounds.....                       | S-2 |
| III. | Determination of the $pK_a$ value.....                                          | S-3 |
| IV.  | $^1\text{H}$ -NMR and $^{13}\text{C}$ -NMR charts of compounds <b>2–8</b> ..... | S-4 |

## I. Determining Fluorescent Quantum Yield

The fluorescent quantum yield (QY) was measured relative to quinine sulfate (QY = 0.577) as a reference compound. The fluorescent spectra of samples were measured in PBS (2  $\mu$ M) at 350 nm exciting-wavelength. Gain and slit bandwidths were applied for these samples, and these QY were calculated as equation,

$$QY = QY_{ref} \frac{\eta^2}{\eta_{ref}^2} \frac{I}{A} \frac{A_{ref}}{I_{ref}}$$

where  $QY_{ref}$  was the quantum yields of quinine sulfate,  $\eta$  was the refractive index of the solvent,  $I$  was the integrated fluorescence intensity and  $A$  was the absorbance at 350 nm excitation wavelength. The concentration of samples should be sufficiently diluted not to occur concentration quenching. Take into consideration inner filter effect the absorbance at 350 nm was kept in under 0.035.

## II. Calculating the saturated concentration of compounds

Saturated solution in PBS was prepared by sonicating the solid compound for 30 min at 20  $^{\circ}$ C. After we ensure that the solid was left in the solution, we filtrate the suspension to give the PBS saturated solution. The saturated concentration was determined from standard curves created by related peak area (detect at 340 nm) against known concentration of compounds in PBS.

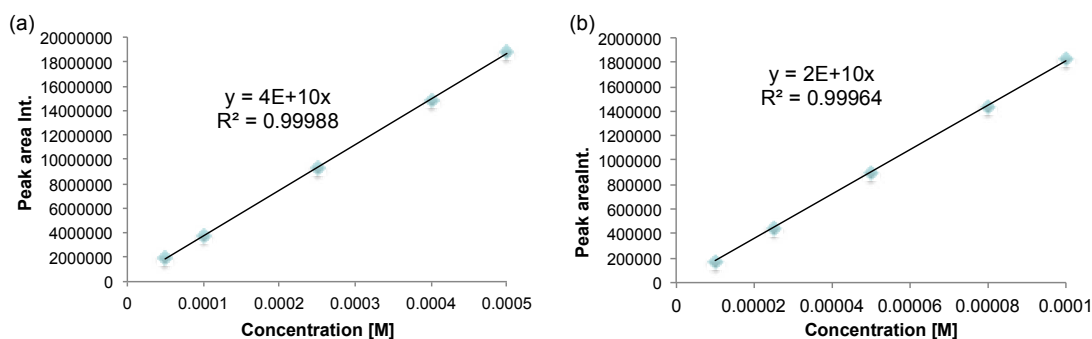

**Figure S1.** Standard curve of (a) 8-aza-hc and (b) hc.

**Table S1.** Saturated concentration ( $C_s$ ) of 8-aza-hc and hc in PBS was calculated from each standard curve.

| compd           | Peak area | $C_s$ [ $\mu$ M] |
|-----------------|-----------|------------------|
| <b>8-aza-hc</b> | 214615200 | 5365             |
| <b>hc</b>       | 12537714  | 627              |

### III. Determination of the $pK_a$ value

The McIlvain buffer with a buffer capacity from pH 2.2 to 8.0 was used as solvent. The acidity of the sample solution was adjusted with addition of 10  $\mu\text{L}$  of 2 M NaOH aq. and sequentially measured the pH values by a pH meter and the absorbance spectrum. The  $pK_a$  value was estimated from the titration curves of absorbance at 350 nm against pH value.

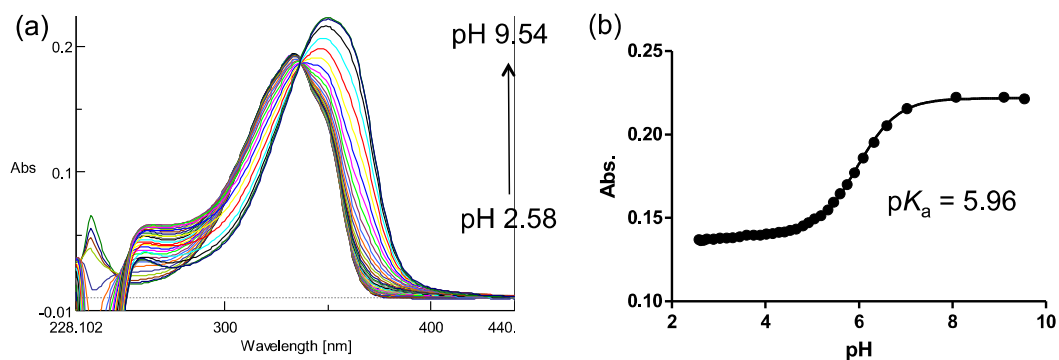

**Figure S2.** (a) the absorption spectra of 8-aza-hc against the pH values. (b) plot of pH to absorbance.

# IV. <sup>1</sup>H-NMR and <sup>13</sup>C-NMR charts of compounds

HTA8-241 CRUDE 2

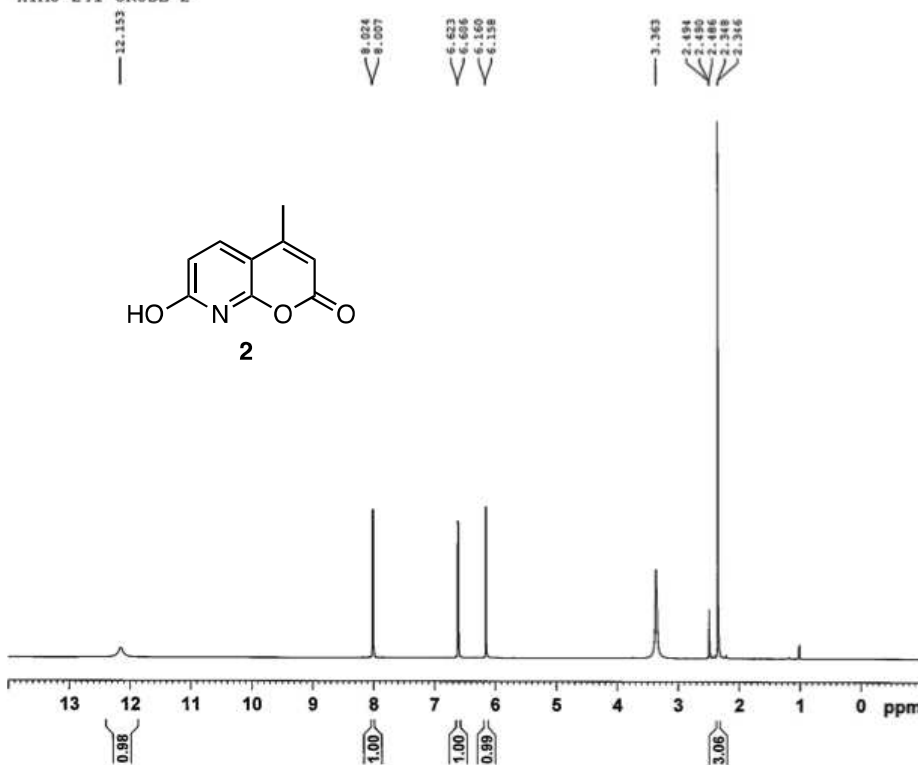

## IBB-nmr Analysis

```

NAME      HTA8-241
EXPNO     2
PROCNO    1
Date_     20141001
Time      21.05
INSTRUM   spect
PROBHD    5 mm CPDCH 13C
PULPROG   zg30
TD         65536
SOLVENT   DMSO
NS         16
DS         2
SWH        10330.578 Hz
FIDRES     0.157632 Hz
AQ         3.1720407 sec
RG         14.3
DW         48.400 usec
DE         6.00 usec
TE         298.0 K
D1         1.00000000 sec
D11        1
TD0        1
  
```

CHANNEL f1

```

NUC1      1H
P1         10.00 usec
PL1        -4.60 dB
PL1W       7.24435949 W
SFO1       500.1330885 MHz
SI         32768
SF         500.1300101 MHz
WDW        EM
SSB        0
LB         0.30 Hz
GB         0
PC         0.50
  
```

HTA8-241 carbon

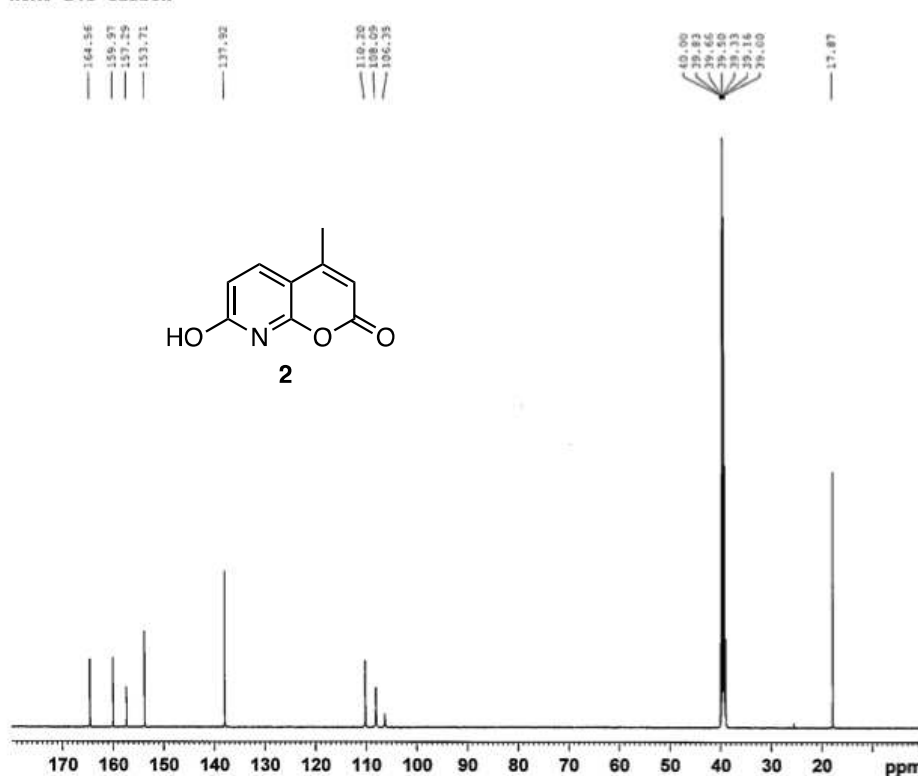

## IBB-nmr Analysis

```

NAME      HTA8-241
EXPNO     3
PROCNO    1
Date_     20141001
Time      21.22
INSTRUM   spect
PROBHD    5 mm CPDCH 13C
PULPROG   zgpg30
TD         65536
SOLVENT   DMSO
NS         256
DS         4
SWH        30030.029 Hz
FIDRES     0.458222 Hz
AQ         1.0912410 sec
RG         456.1
DW         16.650 usec
DE         20.00 usec
TE         298.0 K
D1         2.00000000 sec
D11        0.03000000 sec
TD0        1
  
```

CHANNEL f1

```

NUC1      13C
P1         10.00 usec
PL1        -4.80 dB
PL1W       13.65439701 W
SFO1       125.7703643 MHz
  
```

CHANNEL f2

```

CPDPRG2   waltz16
NUC2      1H
PCPD2     80.00 usec
PL2        -4.80 dB
PL12       12.80 dB
PL13       16.00 dB
PL2W       7.58577585 W
PL12W      0.13182567 W
PL13W      0.06309573 W
SFO2       500.1320005 MHz
SI         32768
SF         125.7578440 MHz
WDW        EM
SSB        0
LB         1.00 Hz
GB         0
PC         0.30
  
```

8-aza-Fhc

8.121  
8.104

6.760  
6.743

3.345

2.512  
2.509  
2.505  
2.501  
2.498  
2.494  
2.490

-0.009

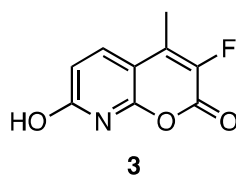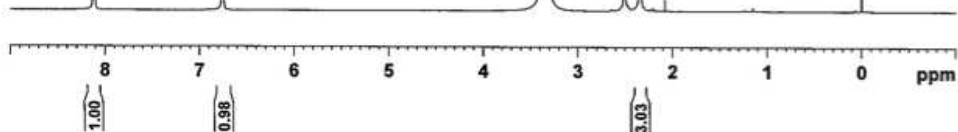

## IBB-nmr Analysis

NAME HTAa1  
EXPNO 53  
PROCNO 1  
Date\_ 20160810  
Time 12.14  
INSTRUM av500  
PROBHD 5 mm CPDCH 13C  
PULPROG zg30  
TD 65536  
SOLVENT DMSO  
NS 16  
DS 2  
SWH 10330.578 Hz  
FIDRES 0.157632 Hz  
AQ 3.1720407 sec  
RG 22.6  
DW 48.400 usec  
DE 6.00 usec  
TE 298.0 K  
D1 1.00000000 sec  
TD0 1

===== CHANNEL f1 =====  
NUC1 1H  
P1 10.00 usec  
PL1 -4.60 dB  
PL1W 7.2435949 W  
SFO1 500.1330885 MHz  
SI 32768  
SF 500.1300037 MHz  
WDW EM  
SSB 0  
LB 0.30 Hz  
GB 0  
PC 0.50

8-aza-Fhc carbon

164.36  
164.35

155.10  
155.06  
154.74

142.19  
142.17  
138.68

132.13  
132.12

108.55  
106.51

40.35  
40.19  
40.02  
39.85  
39.68  
39.52  
39.35

19.39  
19.37

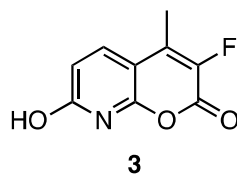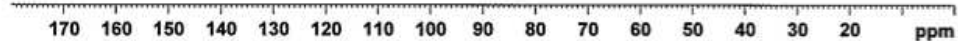

## IBB-nmr Analysis

NAME HTAa1  
EXPNO 52  
PROCNO 1  
Date\_ 20160808  
Time 10.58  
INSTRUM av500  
PROBHD 5 mm CPDCH 13C  
PULPROG zgpg30  
TD 65536  
SOLVENT DMSO  
NS 64  
DS 4  
SWH 30030.029 Hz  
FIDRES 0.458222 Hz  
AQ 1.0912410 sec  
RG 161.3  
DW 16.650 usec  
DE 20.00 usec  
TE 298.0 K  
D1 2.00000000 sec  
D11 0.63000000 sec  
TD0 1

===== CHANNEL f1 =====  
NUC1 13C  
P1 10.00 usec  
PL1 -4.80 dB  
PL1W 13.65439701 W  
SFO1 125.7703643 MHz

===== CHANNEL f2 =====  
CPOBPG2 waltz16  
NUC2 1H  
PCPD2 80.00 usec  
PL2 -4.80 dB  
PL12 12.80 dB  
PL13 16.00 dB  
PL2W 7.58577585 W  
PL12W 0.13182567 W  
PL13W 0.06309573 W  
SFO2 500.1320005 MHz  
SI 32768  
SF 125.7577924 MHz  
WDW EM  
SSB 0  
LB 1.00 Hz  
GB 0  
PC 0.30

HTA11-349

8.146  
8.129

6.713  
6.696

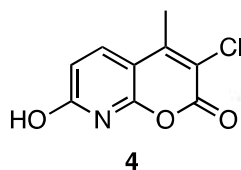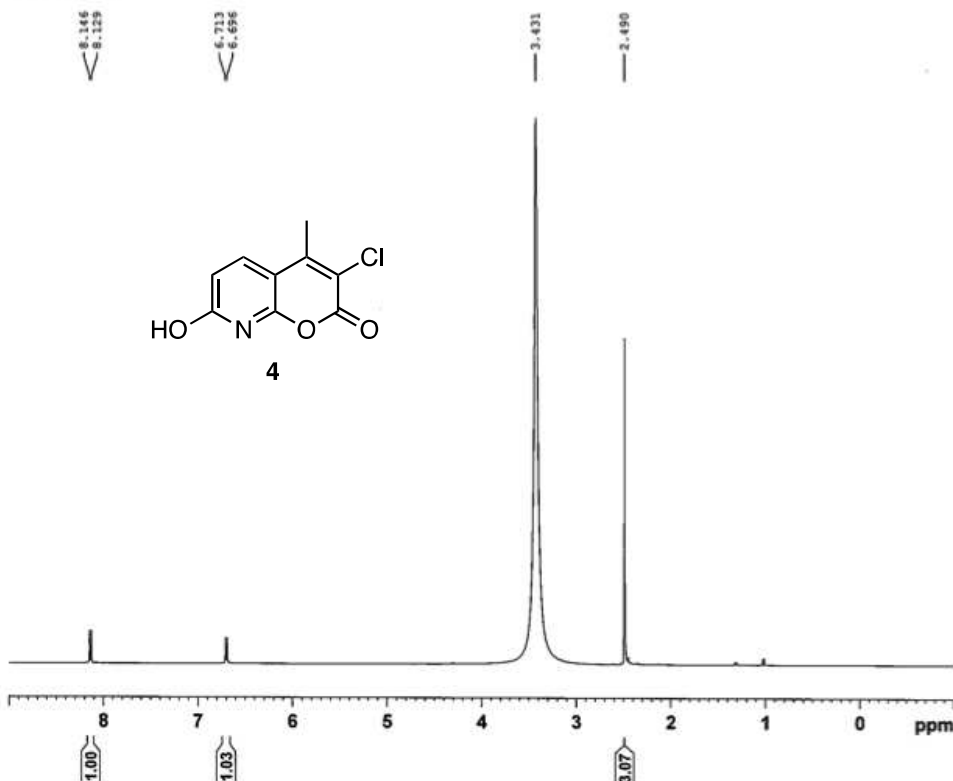

## IBB-nmr Analysis

NAME HTA11-349  
EXPNO 1  
PROCNO 1  
Date 20140722  
Time 10.08  
INSTRUM spect  
PROBHD 5 mm CPDCH 13C  
PULPROG zg30  
TD 65536  
SOLVENT lock11\_CDCl3  
NS 16  
DS 2  
SWH 10330.578 Hz  
FIDRES 0.157632 Hz  
AQ 3.1720407 sec  
RG 14.3  
DW 48.400 usec  
DE 6.00 usec  
TE 298.0 K  
D1 1.00000000 sec  
TD0 1

===== CHANNEL f1 =====  
NUC1 1H  
P1 10.00 usec  
PL1 -4.60 dB  
PL1W 7.24435949 W  
SFO1 500.1330885 MHz  
SI 32768  
SF 500.1323859 MHz  
WDW EM  
SSB 0  
LB 0.30 Hz  
GB 0  
PC 0.50

HTA11-349 carbon

164.80  
154.67  
154.50  
149.64

138.69  
138.65

115.69  
106.50

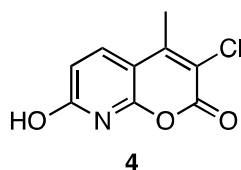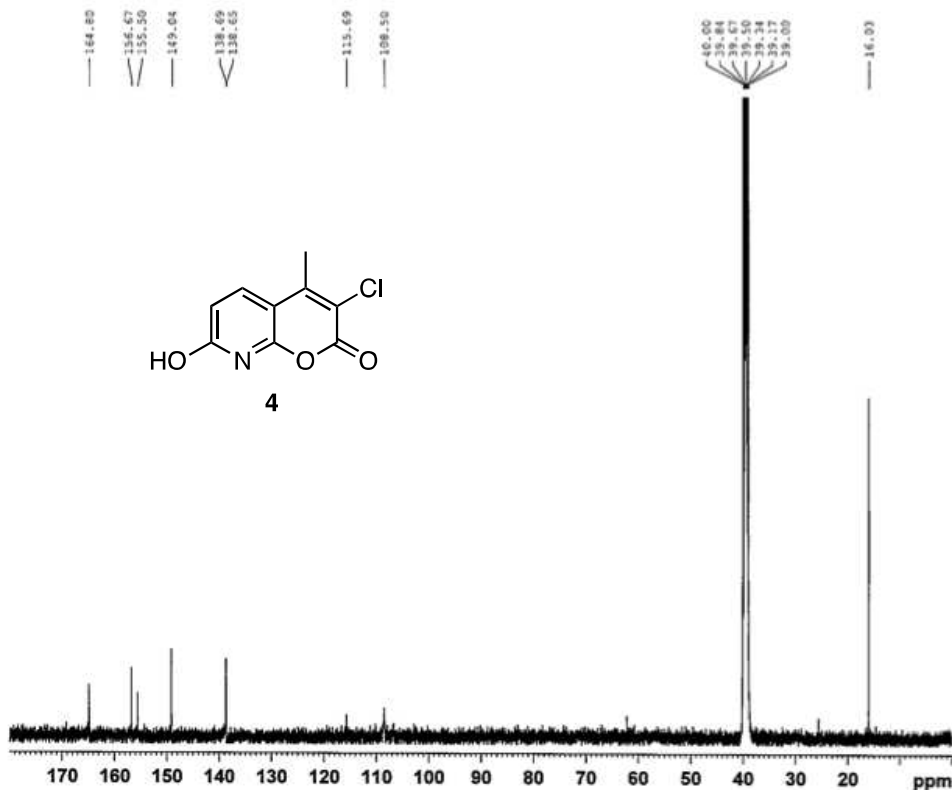

## IBB-nmr Analysis

NAME HTA11-349  
EXPNO 2  
PROCNO 1  
Date 20140722  
Time 10.30  
INSTRUM spect  
PROBHD 5 mm CPDCH 13C  
PULPROG zgpg30  
TD 65536  
SOLVENT lock11\_CDCl3  
NS 256  
DS 4  
SWH 30030.029 Hz  
FIDRES 0.458222 Hz  
AQ 1.0912410 sec  
RG 262  
DW 16.650 usec  
DE 20.00 usec  
TE 298.0 K  
D1 2.00000000 sec  
D11 0.03000000 sec  
TD0 1

===== CHANNEL f1 =====  
NUC1 13C  
P1 10.00 usec  
PL1 -4.80 dB  
PL1W 13.65439701 W  
SFO1 125.7703643 MHz

===== CHANNEL f2 =====  
CFOPRG2 waltz16  
NUC2 1H  
PCPD2 80.00 usec  
PL2 -4.80 dB  
PL12 12.80 dB  
PL13 16.00 dB  
PL2W 7.5857585 W  
PL12W 0.13182567 W  
PL13W 0.06309573 W  
SFO2 500.1320005 MHz  
SI 32768  
SF 125.7584323 MHz  
WDW EM  
SSB 0  
LB 1.00 Hz  
GB 0  
PC 0.30

## HTA10-310 purification

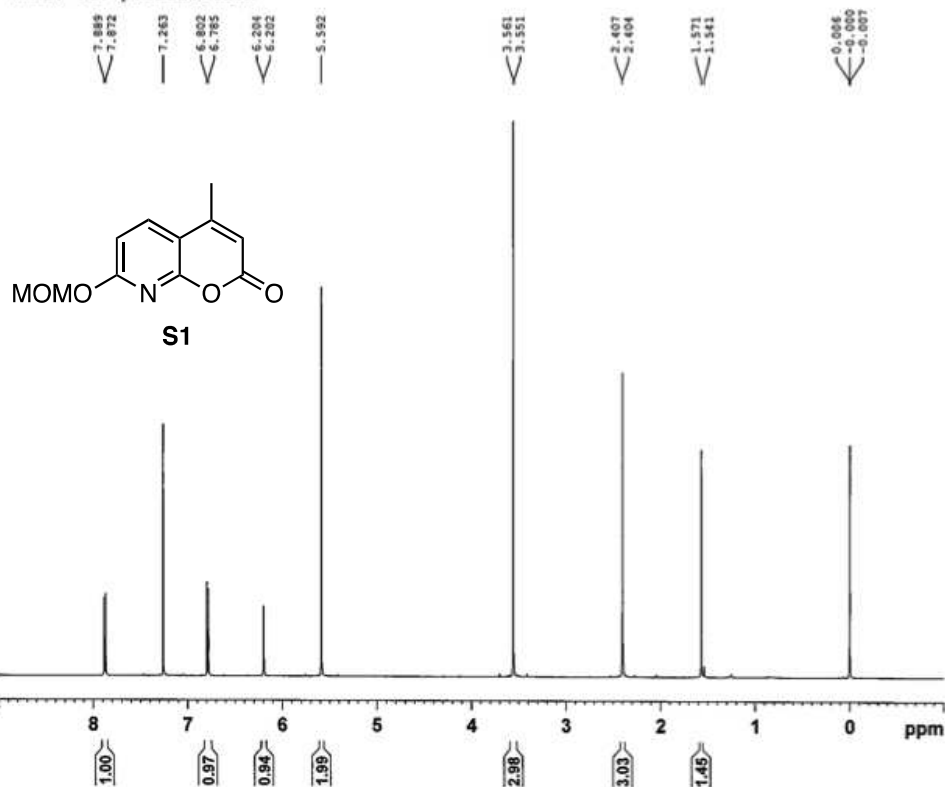

## IBB-nmr Analysis

NAME HTA10-310  
 EXPNO 2  
 PROCNO 1  
 Date\_ 20140519  
 Time\_ 16.59  
 INSTRUM spect  
 PROBHD 5 mm CPDCH 13C  
 PULPROG zg30  
 TD 65536  
 SOLVENT lock11\_CDCl3  
 NS 16  
 DS 2  
 SWH 10330.578 Hz  
 FIDRES 0.157632 Hz  
 AQ 3.1720407 sec  
 RG 14.3  
 DW 48.400 usec  
 DE 6.00 usec  
 TE 298.0 K  
 D1 1.00000000 sec  
 TDO 1

===== CHANNEL f1 =====  
 NUC1 1H  
 P1 10.00 usec  
 PL1 -4.60 dB  
 PL1W 7.24435949 W  
 SFO1 500.1330885 MHz  
 SI 32768  
 SF 500.1330111 MHz  
 WDW EM  
 SSB 0  
 LB 0.30 Hz  
 GB 0  
 PC 0.50

## HTA10-310 purification carbon

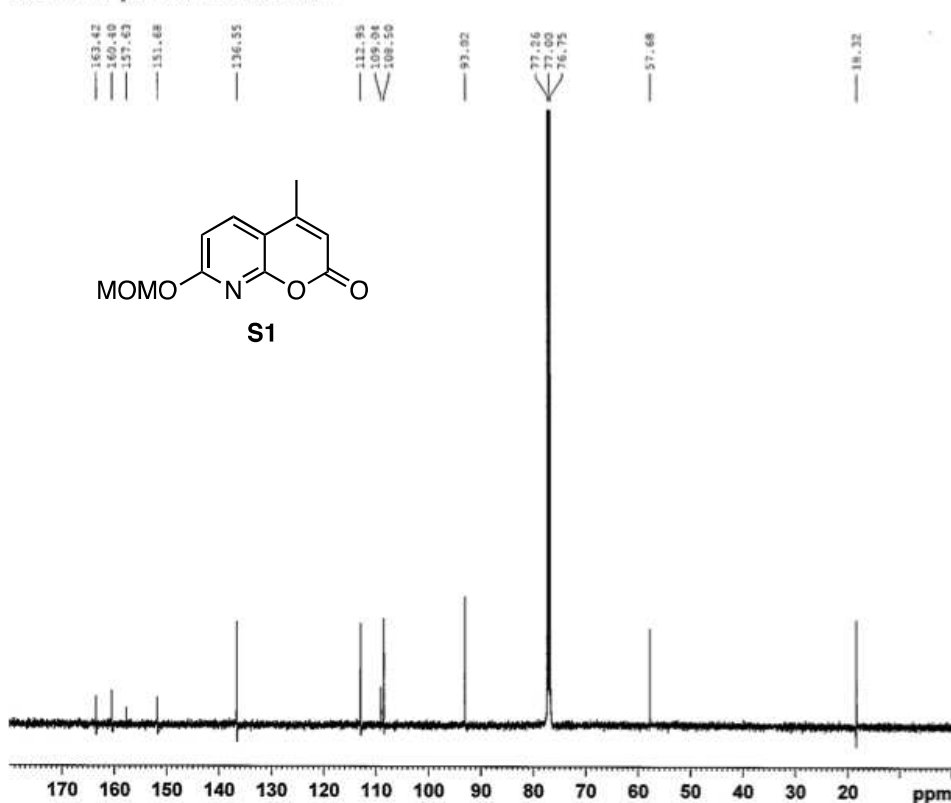

## IBB-nmr Analysis

NAME HTA10-310  
 EXPNO 3  
 PROCNO 1  
 Date\_ 20140519  
 Time\_ 17.16  
 INSTRUM spect  
 PROBHD 5 mm CPDCH 13C  
 PULPROG zgpg30  
 TD 65536  
 SOLVENT lock11\_CDCl3  
 NS 256  
 DS 4  
 SWH 30030.029 Hz  
 FIDRES 0.458222 Hz  
 AQ 1.0912410 sec  
 RG 456.1  
 DW 16.650 usec  
 DE 20.00 usec  
 TE 298.0 K  
 D1 2.00000000 sec  
 D11 0.03000000 sec  
 TDO 1

===== CHANNEL f1 =====  
 NUC1 13C  
 P1 10.00 usec  
 PL1 -4.80 dB  
 PL1W 13.65439701 W  
 SFO1 125.7703643 MHz

===== CHANNEL f2 =====  
 CPDPRG2 waltz16  
 NUC2 1H  
 PCPD2 80.00 usec  
 PL2 -4.80 dB  
 PL12 12.80 dB  
 PL13 16.00 dB  
 PL2W 7.58577585 W  
 PL12W 0.13182567 W  
 PL13W 0.06309573 W  
 SFO2 500.1320005 MHz  
 SI 32768  
 SF 125.7577919 MHz  
 WDW EM  
 SSB 0  
 LB 1.00 Hz  
 GB 0  
 PC 0.30

## HTA11-350 purification

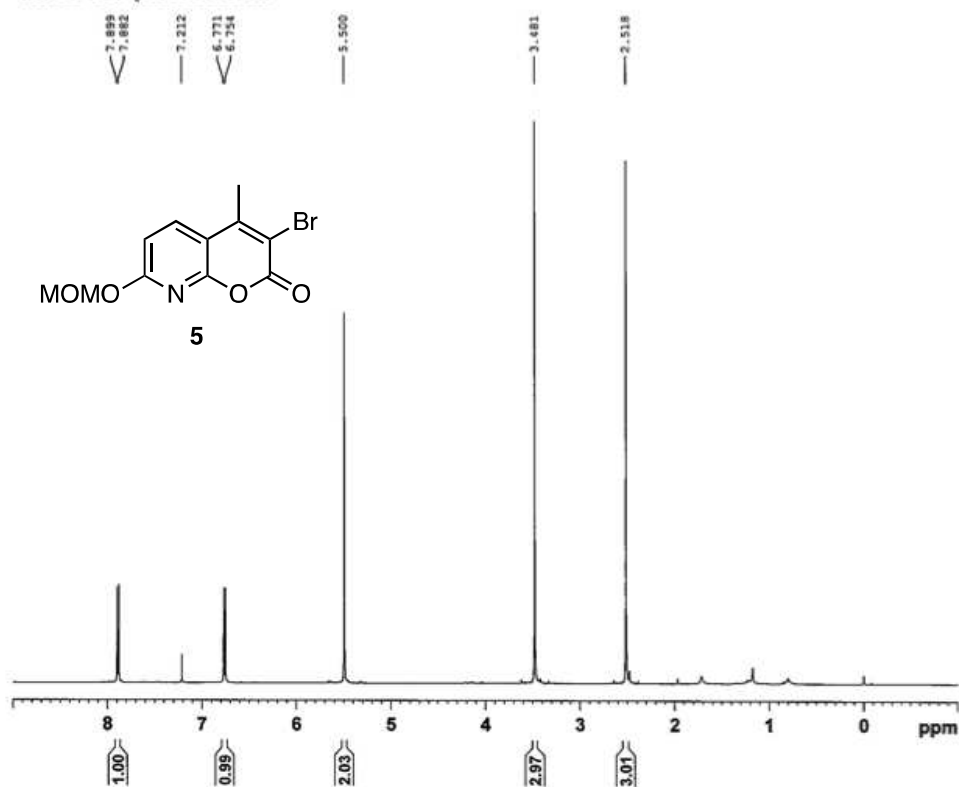

## IBB-nmr Analysis

```

NAME      HTA11-350
EXPNO     6
PROCNO    1
Date_     20141001
Time      21.28
INSTRUM   spect
PROBHD    5 mm CPDCH 13C
PULPROG   zg30
TD         65536
SOLVENT   lock11_CDCl3
NS         16
DS         2
SWH        10330.578 Hz
FIDRES     0.157632 Hz
AQ         3.1720407 sec
RG         14.3
DW         49.400 usec
DE         6.00 usec
TE         298.0 K
D1         1.00000000 sec
TD0        1

===== CHANNEL f1 =====
NUC1       1H
P1         10.00 usec
PL1        -4.60 dB
PL1W       7.24435949 W
SFO1       500.1330885 MHz
SI         32768
SF         500.1300374 MHz
WDW        EM
SSB        0
LB         0.30 Hz
GB         0
PC         0.50

```

## HTA11-350 purification carbon

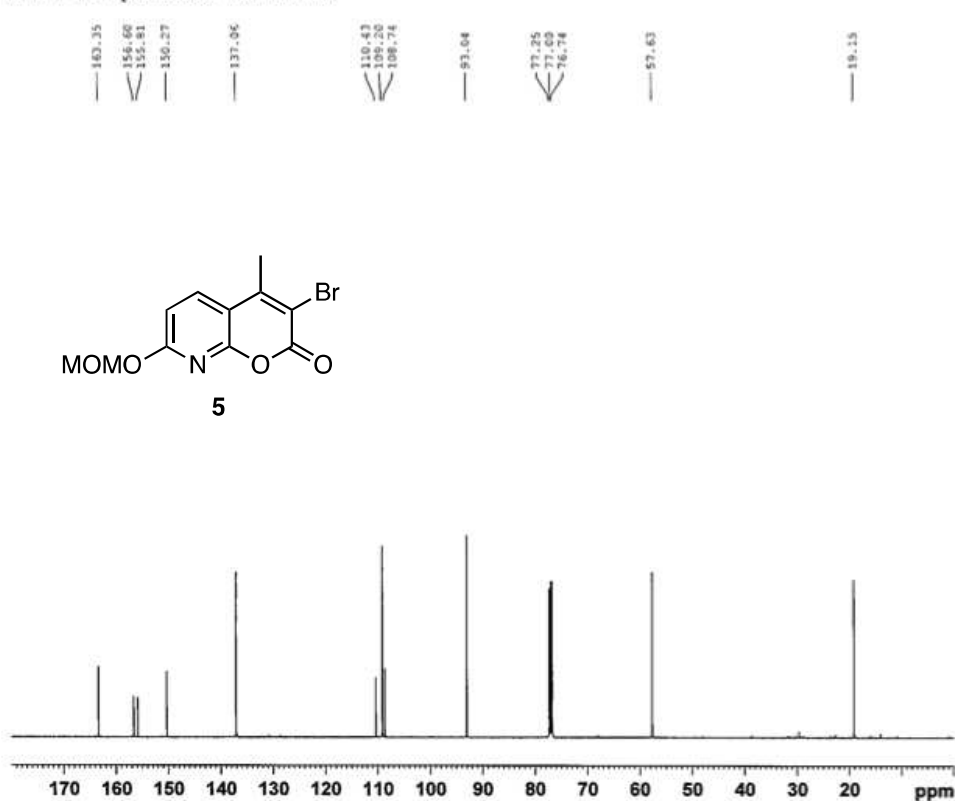

## IBB-nmr Analysis

```

NAME      HTA11-350
EXPNO     7
PROCNO    1
Date_     20141001
Time      21.44
INSTRUM   spect
PROBHD    5 mm CPDCH 13C
PULPROG   zgpg30
TD         65536
SOLVENT   lock11_CDCl3
NS         256
DS         4
SWH        30030.029 Hz
FIDRES     0.438222 Hz
AQ         1.0912410 sec
RG         256
DW         16.650 usec
DE         20.00 usec
TE         298.0 K
D1         2.00000000 sec
D11        0.03000000 sec
TD0        1

===== CHANNEL f1 =====
NUC1       13C
P1         10.00 usec
PL1        -4.80 dB
PL1W       13.65439701 W
SFO1       125.7703643 MHz

===== CHANNEL f2 =====
CPDPRG2    waltz16
NUC2       1H
PCPD2      80.00 usec
PL2        -4.80 dB
PL12       12.80 dB
PL13       16.00 dB
PL2W       7.58577585 W
PL12W      0.13182567 W
PL13W      0.06309573 W
SFO2       500.1320005 MHz
SI         32768
SF         125.7578010 MHz
WDW        EM
SSB        0
LB         1.00 Hz
GB         0
PC         0.30

```



HTA10-304 purification

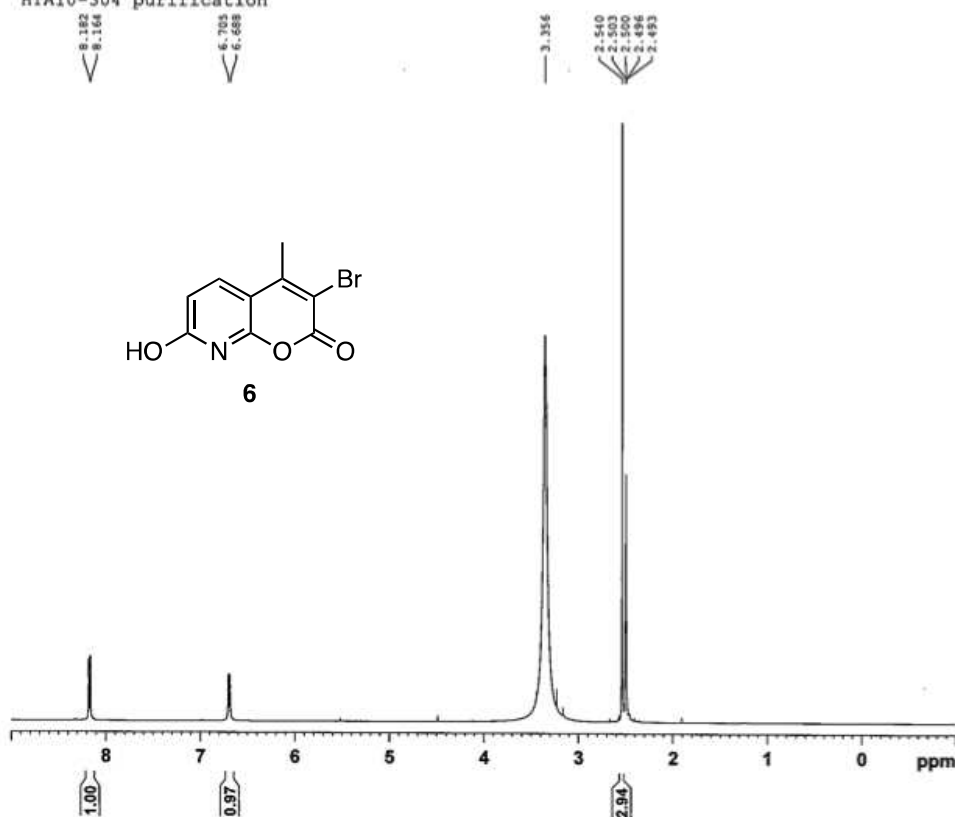

## IBB-nmr Analysis

NAME HTA10-304  
 EXPNO 4  
 PROCNO 1  
 Date\_ 20141006  
 Time 22.12  
 INSTRUM spect  
 PROBRD 5 mm CPDCH 13C  
 PULPROG zg30  
 TD 65536  
 SOLVENT DMSO  
 NS 16  
 DS 2  
 SWH 10330.578 Hz  
 FIDRES 0.157632 Hz  
 AQ 3.1720407 sec  
 RG 28.5  
 DW 48.400 usec  
 DE 6.00 usec  
 TE 298.0 K  
 D1 1.00000000 sec  
 TD0 1

----- CHANNEL f1 -----  
 NUC1 1H  
 P1 10.00 usec  
 PL1 -4.60 dB  
 PL1W 7.24435949 W  
 SFO1 500.1330885 MHz  
 SI 32768  
 SF 500.1300051 MHz  
 WDW EM  
 SSB 0  
 LB 0.30 Hz  
 GB 0  
 PC 0.50

8-aza-Bhc carbon

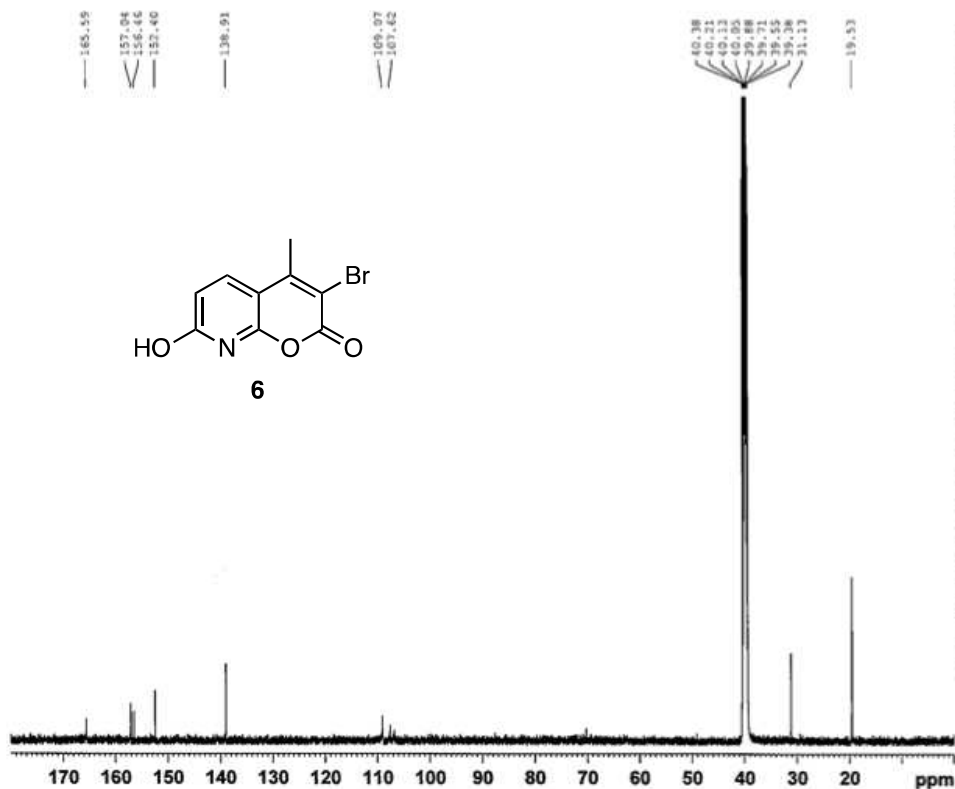

## IBB-nmr Analysis

NAME HTA si  
 EXPNO 53  
 PROCNO 1  
 Date\_ 20160805  
 Time 15.26  
 INSTRUM av500  
 PROBRD 5 mm CPDCH 13C  
 PULPROG zgpg30  
 TD 65536  
 SOLVENT DMSO  
 NS 64  
 DS 4  
 SWH 30030.029 Hz  
 FIDRES 0.458222 Hz  
 AQ 1.0912410 sec  
 RG 181  
 DW 16.650 usec  
 DE 20.00 usec  
 TE 298.0 K  
 D1 2.00000000 sec  
 D11 0.03000000 sec  
 TD0 1

----- CHANNEL f1 -----  
 NUC1 13C  
 P1 10.00 usec  
 PL1 -4.80 dB  
 PL1W 13.65439701 W  
 SFO1 125.7703643 MHz

----- CHANNEL f2 -----  
 CPDPRG2 waltz16  
 NUC2 1H  
 PCPD2 80.00 usec  
 PL2 -4.80 dB  
 PL12 12.80 dB  
 PL13 16.00 dB  
 PL12W 7.58577585 W  
 PL12W 0.13182567 W  
 PL13W 0.06309573 W  
 SFO2 500.1320005 MHz  
 SI 32768  
 SF 125.7577924 MHz  
 WDW EM  
 SSB 0  
 LB 1.00 Hz  
 GB 0  
 PC 0.30

## HTA11-394 purification

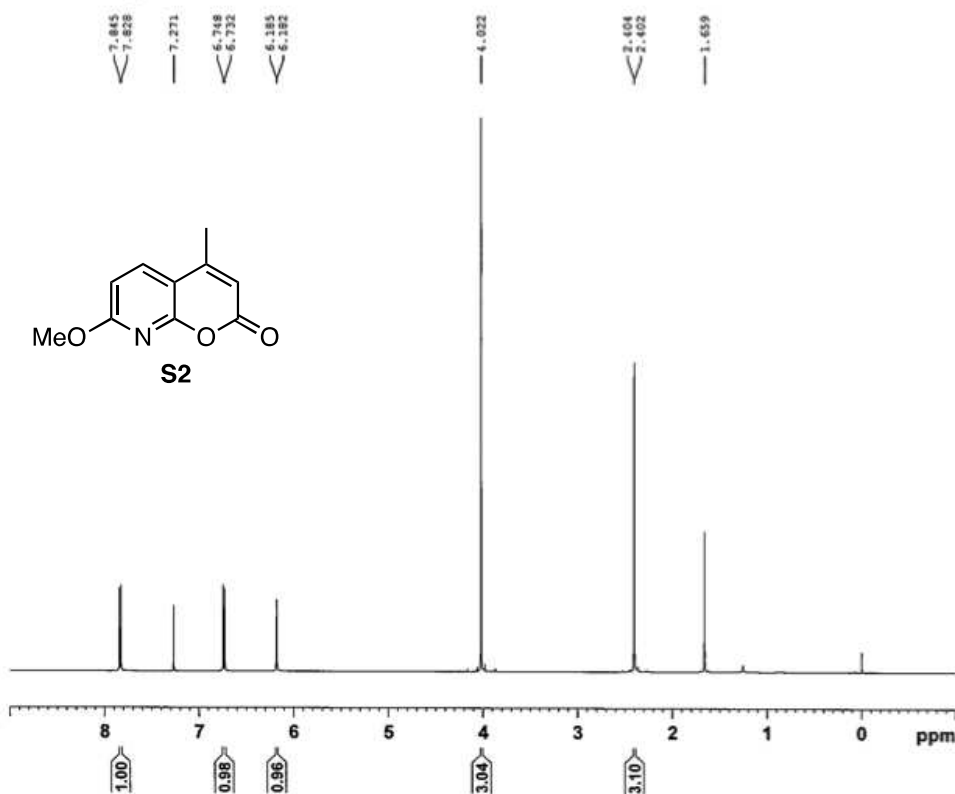

## IBB-nmr Analysis

```

NAME      HTA11-394
EXPNO     2
PROCNO    1
Date_     20140902
Time      11.17
INSTRUM   spect
PROBHD    5 mm CPDCH 13C
PULPROG   zg30
TD         65536
SOLVENT   lock11_CDCl3
NS         16
DS         2
SWH        10330.578 Hz
FIDRES     0.157632 Hz
AQ         3.1720407 sec
RG         14.3
DW         48.400 usec
DE         6.00 usec
TE         298.0 K
D1         1.00000000 sec
TD0        1

===== CHANNEL f1 =====
NUC1       1H
P1         10.00 usec
PL1        -4.60 dB
PL1W       7.2435949 W
SFO1       500.1330885 MHz
SI         32768
SF         500.1300081 MHz
WDW        EM
SSB        0
LB         0.30 Hz
GB         0
PC         0.50

```

## HTA11-391 purification carbon

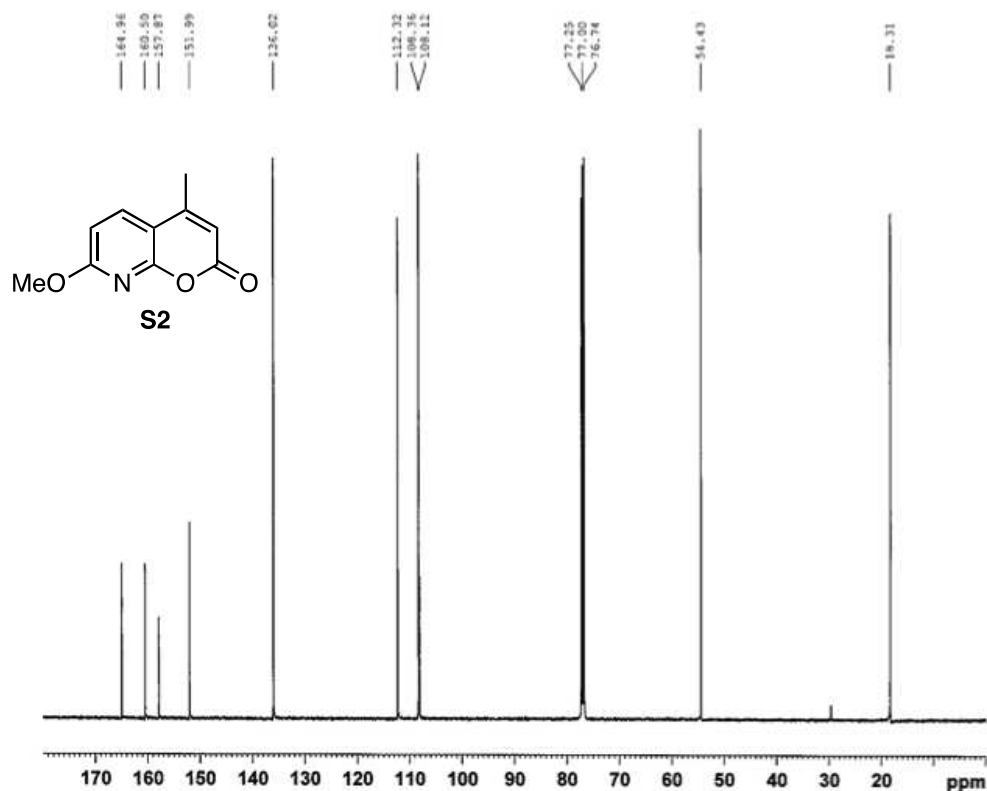

## IBB-nmr Analysis

```

NAME      HTA11-391
EXPNO     4
PROCNO    1
Date_     20141001
Time      22.31
INSTRUM   spect
PROBHD    5 mm CPDCH 13C
PULPROG   zgpg30
TD         65536
SOLVENT   lock11_CDCl3
NS         256
DS         4
SWH        30030.029 Hz
FIDRES     0.458222 Hz
AQ         1.0912410 sec
RG         228.1
DW         16.650 usec
DE         20.00 usec
TE         298.0 K
D1         2.00000000 sec
D11        0.03000000 sec
TD0        1

===== CHANNEL f1 =====
NUC1       13C
P1         10.00 usec
PL1        -4.80 dB
PL1W       13.65439701 W
SFO1       125.7703643 MHz

===== CHANNEL f2 =====
CPDPRG2   waltz16
NUC2       1H
PCPD2     80.00 usec
PL2        -4.80 dB
PL12       12.80 dB
PL13       16.00 dB
PL2W       7.58577585 W
PL12W      0.13182567 W
PL13W      0.06309573 W
SFO2       500.1320005 MHz
SI         32768
SF         125.7577983 MHz
WDW        EM
SSB        0
LB         1.00 Hz
GB         0
PC         0.30

```

HTA11-362 purification up

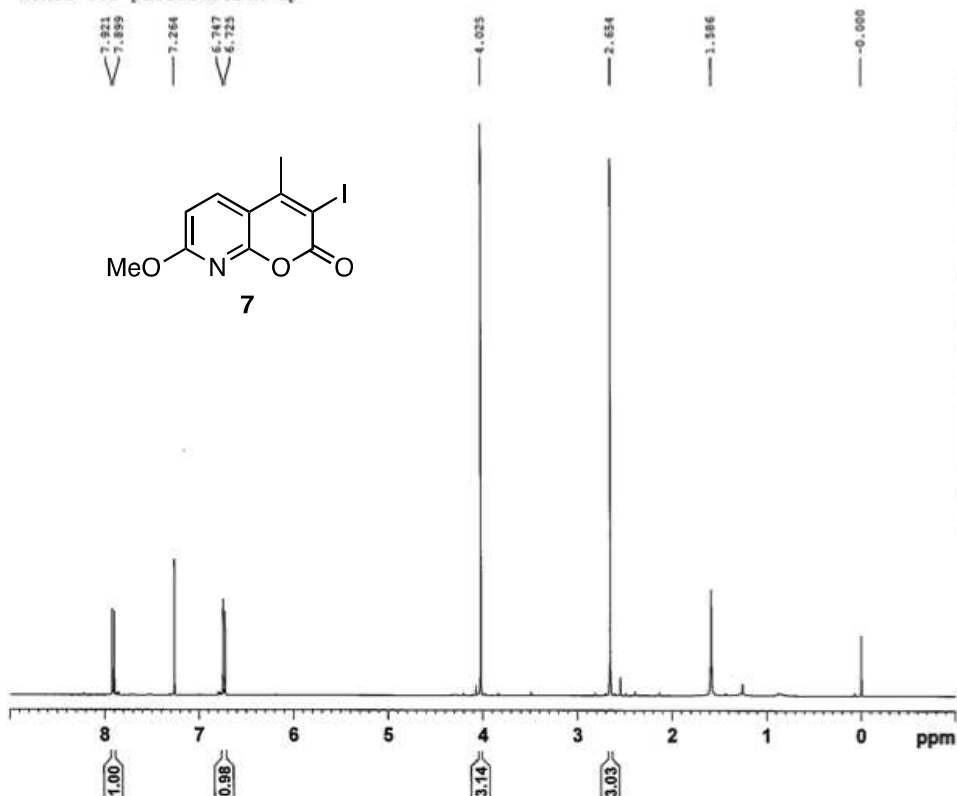

## IBB-nmr Analysis

```

NAME      HTA11-362
EXPNO     2
PROCNO    1
Date_     20140804
Time      20.10
INSTRUM   av400
PROBHD    5 mm PABBO BB-
PULPROG   zg30
TD         65536
SOLVENT   CDC13
NS         16
DS         2
SWH        8223.685 Hz
FIDRES     0.125483 Hz
AQ         3.9846387 sec
RG         203
DW         60.800 usec
DE         6.50 usec
TE         300.6 K
D1         1.00000000 sec
D10        1
  
```

```

===== CHANNEL f1 =====
NUC1      1H
P1        14.00 usec
PL1       -1.80 dB
PL1W      14.82738590 W
SFO1      400.1324710 MHz
SI        32768
SF        400.1300077 MHz
WDW        EM
SSB        0
LB         0.30 Hz
GB         0
PC         1.00
  
```

HTA12-416 purification carbon

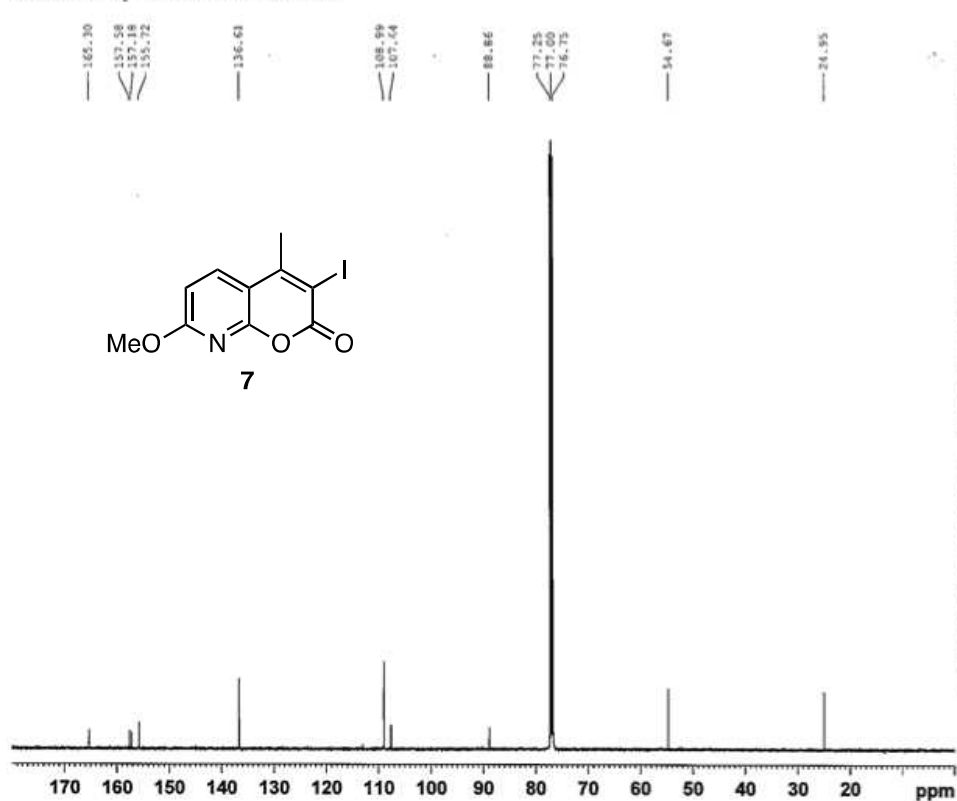

## IBB-nmr Analysis

```

NAME      HTA12-416
EXPNO     4
PROCNO    1
Date_     20141006
Time      22.08
INSTRUM   spect
PROBHD    5 mm CPOC-13C
PULPROG   zgpg30
TD         65536
SOLVENT   lock11 CDC13
NS         256
DS         4
SWH        30030.029 Hz
FIDRES     0.458222 Hz
AQ         1.0912410 sec
RG         256
DW         16.650 usec
DE         20.00 usec
TE         298.0 K
D1         2.00000000 sec
D11        0.03000000 sec
D10        1
  
```

```

===== CHANNEL f1 =====
NUC1      13C
P1        10.00 usec
PL1       -4.80 dB
PL1W      13.65439701 W
SFO1      125.7703643 MHz

===== CHANNEL f2 =====
CPDPRG2   waltz16
NUC2      1H
PCPD2     80.00 usec
PL2       -4.80 dB
PL12      12.80 dB
PL13      16.00 dB
PL2W      7.58577585 W
PL12W     0.13182567 W
PL13W     0.06309573 W
SFO2      500.1320005 MHz
SI        32768
SF        125.7577928 MHz
WDW        EM
SSB        0
LB         1.00 Hz
GB         0
PC         0.30
  
```

HTA17-802 purification

## IBB-nmr Analysis

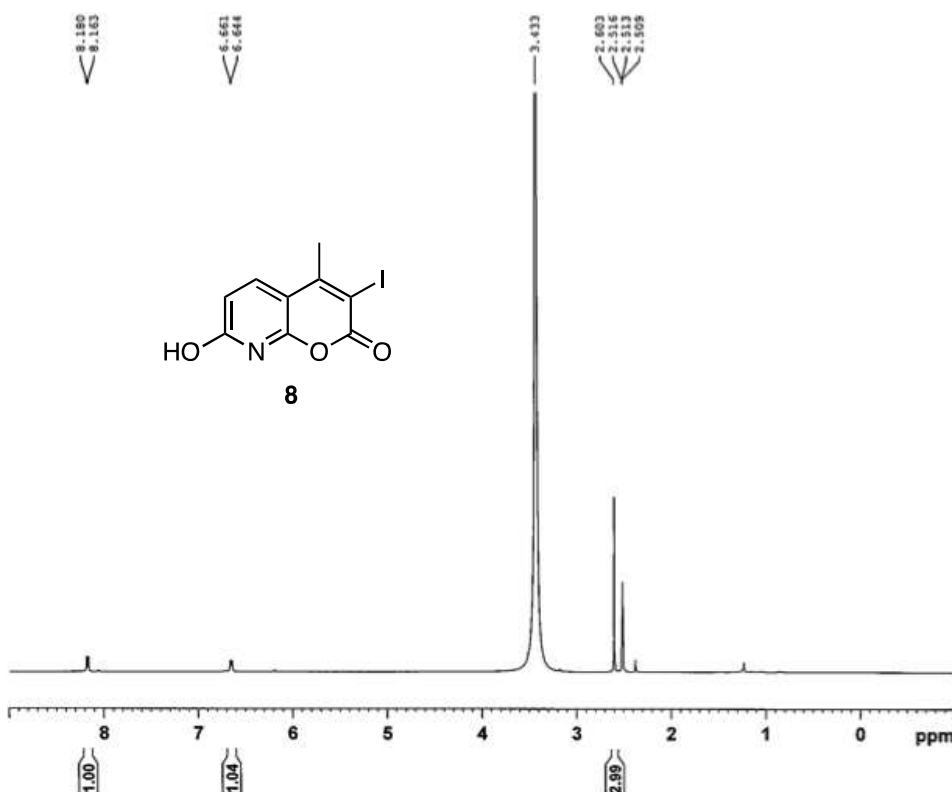

```

NAME      HTA17-802
EXPNO     1
PROCNO    1
Date_     20160808
Time      10.38
INSTRUM   av500
PROBHD    5 mm CPDCH 13C
PULPROG   zg30
TD         65536
SOLVENT   DMSO
NS         16
DS         2
SWH        10330.578 Hz
FIDRES     0.157632 Hz
AQ         3.1720407 sec
RG         14.3
DM         48.400 usec
DE         6.00 usec
TE         298.0 K
D1         1.00000000 sec
TD0        1
  
```

----- CHANNEL f1 -----

```

NUC1       1H
P1         10.00 usec
PL1        -4.60 dB
PL1W       7.24435949 W
SFO1       500.1330885 MHz
SI         32768
SF         500.1300000 MHz
WDW        EM
SSB        0
LB         0.30 Hz
GB         0
PC         0.50
  
```

HTA17-802 purification carbon

## IBB-nmr Analysis

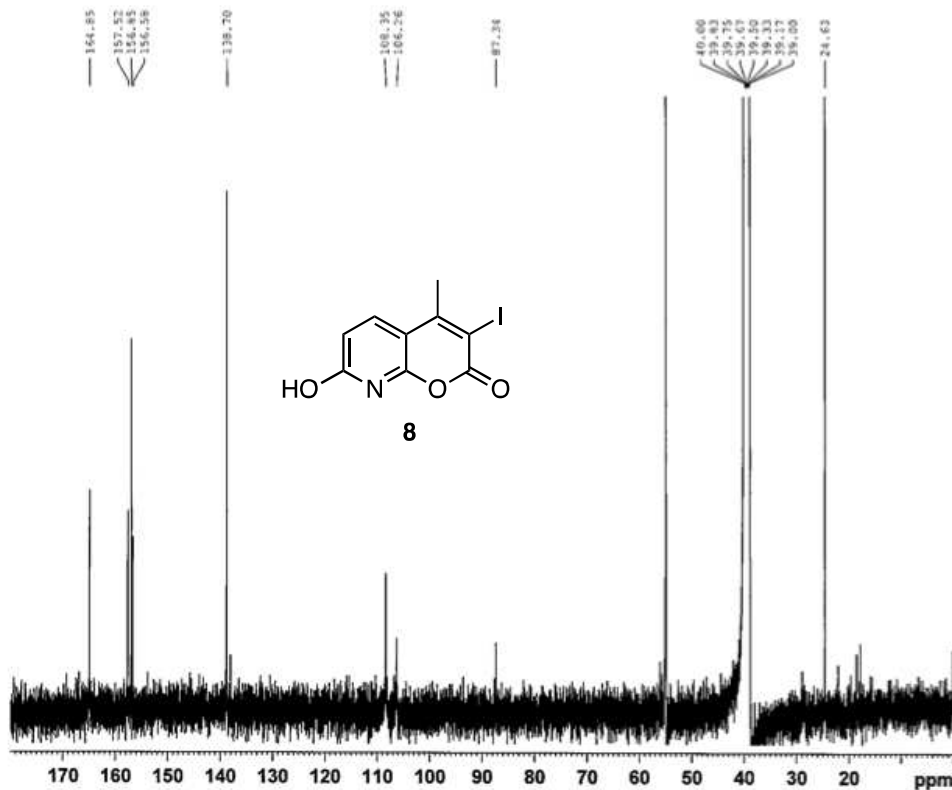

```

NAME      HTA17-802
EXPNO     4
PROCNO    1
Date_     20160808
Time      15.11
INSTRUM   av500
PROBHD    5 mm CPDCH 13C
PULPROG   zgpg30
TD         65536
SOLVENT   DMSO
NS         1024
DS         4
SWH        30030.029 Hz
FIDRES     0.458222 Hz
AQ         1.0912410 sec
RG         161.3
DM         16.650 usec
DE         20.00 usec
TE         298.0 K
D1         2.00000000 sec
D11        0.03000000 sec
TD0        1
  
```

----- CHANNEL f1 -----

```

NUC1       13C
P1         10.00 usec
PL1        -4.80 dB
PL1W       13.65439701 W
SFO1       125.7703643 MHz
  
```

----- CHANNEL f2 -----

```

CPDPRG2   waltz16
NUC2       1H
PCPD2      80.00 usec
PL2        -4.80 dB
PL12       12.80 dB
PL13       16.00 dB
PL2W       7.58577585 W
PL12W      0.13182567 W
PL13W      0.06309573 W
SFO2       500.1320000 MHz
SI         32768
SF         125.7578495 MHz
WDW        EM
SSB        0
LB         1.00 Hz
GB         0
PC         0.30
  
```
